# Supplementary material
Source: publisher site journal article supplement (https://www.spandidos-publications.com/4543/downloadSupplementary)
Supplement: Supplementary file 1 [file downloadSupplementary]

## Sheet: Sheet1
Table SII. Panel of 95 known cancer genes for NGS analysis.
ABCB1	ABCC4	AKT1	ALK	APC	ATIC
ATM	BRAF	C8orf34	CBR3	CDA	CDC5L
CDKN2A	CMPK1	CSF1R	CTNNB1	CYBA	CYP19A1
CYP2D6	DCK	DDR2	DHFR	DPYD	DYNC2H1
EGFR	ERBB2	ERBB4	ERCC1	ESR1	ESR2
FBXW7	FGFR2	FGFR3	FOLR3	FOXL2	GALNT14
GGH	GNA11	GNAQ	GNAS	GSTP1	HRAS
IDH1	IDH2	JAK1	JAK2	JAK3	KDR
KIT	KRAS	MAP2K1	MED12	MET	MTHFR
MTOR	MTRR	NCF4	NOS3	NOTCH1	NOTCH2
NQO1	NRAS	NT5C2	NTRK1	NTRK2	NTRK3
OBSCN	PAPD7	PDGFRA	PIK3CA	PTEN	RAC2
RB1	RET	ROS1	RRM1	SEMA3C	SLC19A1
SLC29A1	SMAD4	SMO	SOD2	SRC	STK11
TERT	TP53	TPMT	TYMS	UGT1A1	UMPS
VHL	XPC	XRCC1	CD3EAP	MSH3
